# Supplementary material for: Formation of Lipofuscin-Like Autofluorescent Granules in the Retinal Pigment Epithelium Requires Lysosome Dysfunction
Source: PubMed Central journal article supplement — Invest Ophthalmol Vis Sci. 2021 Jul 27;62(9):39. doi: 10.1167/iovs.62.9.39 (PMC8322709; doi:10.1167/iovs.62.9.39), 2021-07-27
Supplement: iovs-62-9-39_s001.pdf [file iovs-62-9-39_s001.pdf]

**A**

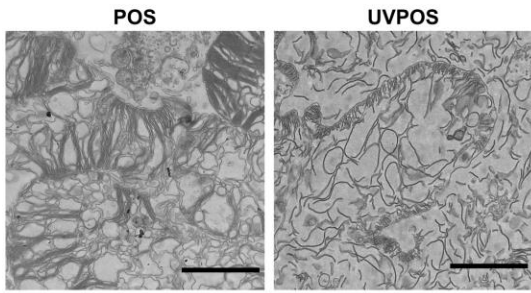

**B**

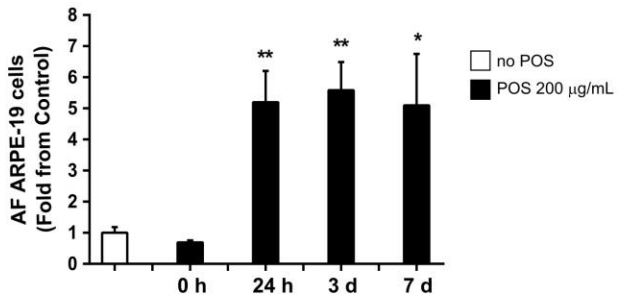

**C**

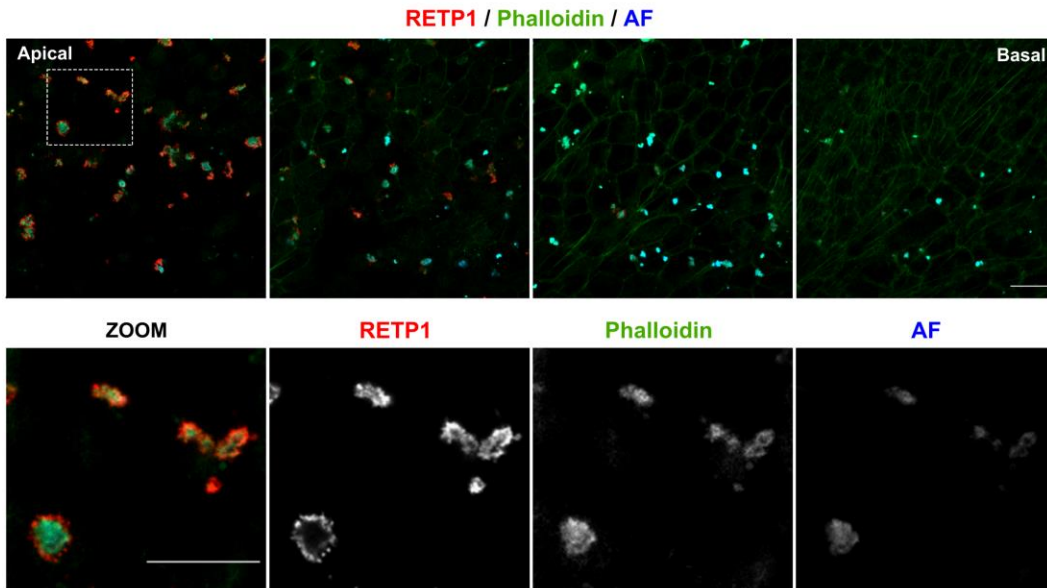

**Figure S1**

**Figure S1. Kinetics of AF appearance in different RPE cell lines.** (A) Porcine POS and UV-irradiated POS were isolated as described in “Material and Methods”. Pellets were processed for EM and random sections of the pellet were imaged. Scale bar: 2  $\mu\text{m}$ . (B) ARPE-19 cells pulsed with 200  $\mu\text{g}/\text{mL}$  POS were monitored at the indicated time points after POS incubation. AF levels were quantified by flow cytometry as in “Material and Methods” and are represented as mean  $\pm$  SEM of 3 independent experiments, performed in duplicate. Statistical comparison was performed using one-way ANOVA followed by Dunnet’s multiple comparison test, significant differences are relative to cells with no POS (\*\* $P < 0.01$ ; \* $P < 0.05$ ). (C) hfRPE cells were pulsed with 200  $\mu\text{g}/\text{mL}$ , chased for 3 days and AFGs were visualized by confocal immunofluorescence microscopy (blue). Rhodopsin-positive POS were detected using an anti-rhodopsin antibody (RetP1, red) and Phalloidin staining (green) was used to monitor cell limits. Different Z-slices are represented from the basal to apical cell layer. The region outlined with a square was zoomed (ZOOM) and the different channels separated. Images are representative of three independent experiments. Scale bar: 20  $\mu\text{m}$ .
