# Supplementary material for: Formation of Lipofuscin-Like Autofluorescent Granules in the Retinal Pigment Epithelium Requires Lysosome Dysfunction
Source: PubMed Central journal article supplement — Invest Ophthalmol Vis Sci. 2021 Jul 27;62(9):39. doi: 10.1167/iovs.62.9.39 (PMC8322709; doi:10.1167/iovs.62.9.39), 2021-07-27
Supplement: iovs-62-9-39_s002.pdf [file iovs-62-9-39_s002.pdf]

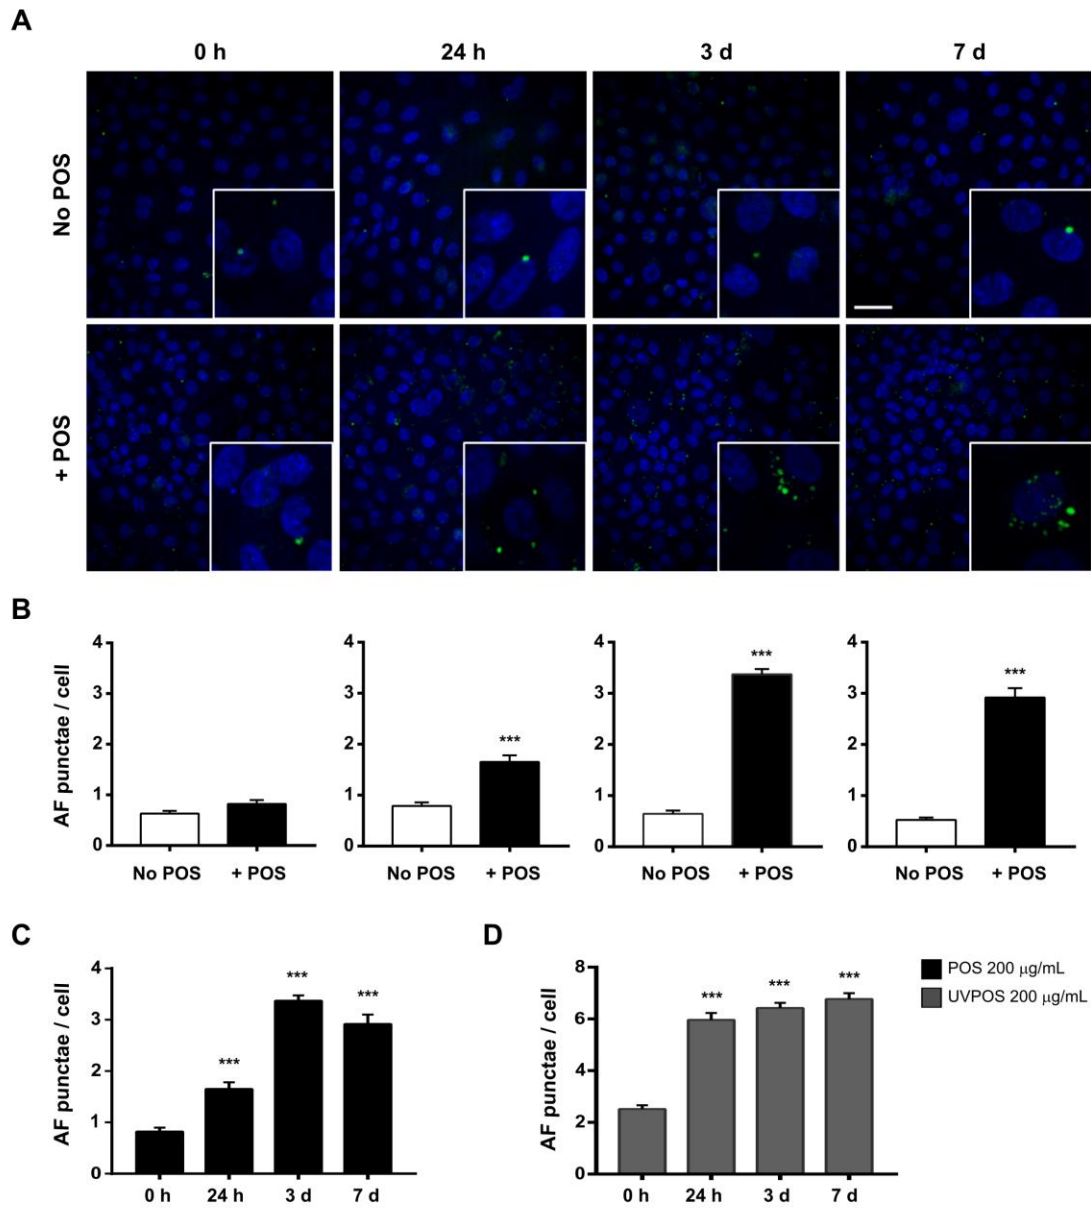

Figure S2

**Figure S2. Quantification of AFGs in pRPE.** pRPE were pulsed once with POS or UV-irradiated POS and chased for the indicated time points before fixing and imaging AF in the 488 emission channel with a high-content imaging platform. **(A)** Representative maximum intensity projections of confocal slices are shown. Blue: DAPI; Green: AF. Scale bar: 15  $\mu\text{m}$  **(B)** The difference in the number of granules per cell between cells with no POS and POS, at the different time points, and the number of granules per cell overtime in **(C)** cells incubated with POS or **(D)** UV-irradiated POS (UVPOS) were quantitated from the z-stacks. Values are represented as mean  $\pm$  SEM of the number of AF punctae/number of DAPI punctae per field of view. A single biological replicate with a minimum of 1500 cells from at least 4 wells was analysed per condition. Statistical differences, relative to cells with no POS, were performed using the one one-way ANOVA followed by Kruskal Wallis test and differences relative to POS 0h were performed using Mann-Whitney t test. (\*\*\*\*P<0.001).
