# Supplementary material for: Formation of Lipofuscin-Like Autofluorescent Granules in the Retinal Pigment Epithelium Requires Lysosome Dysfunction
Source: PubMed Central journal article supplement — Invest Ophthalmol Vis Sci. 2021 Jul 27;62(9):39. doi: 10.1167/iovs.62.9.39 (PMC8322709; doi:10.1167/iovs.62.9.39), 2021-07-27
Supplement: iovs-62-9-39_s004.pdf [file iovs-62-9-39_s004.pdf]

**A**

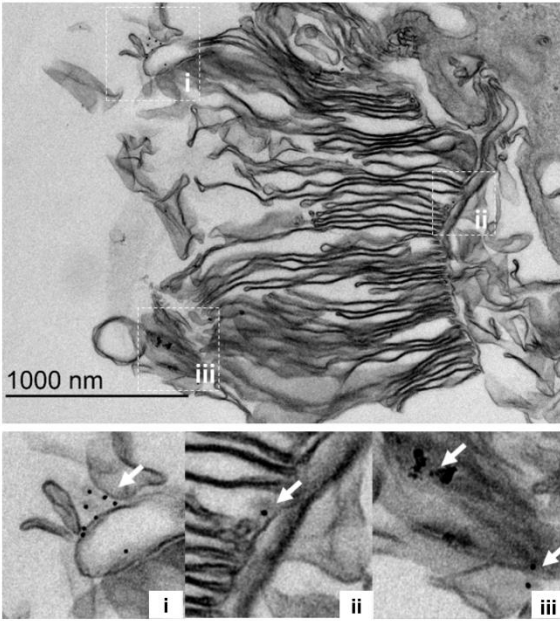

**B**

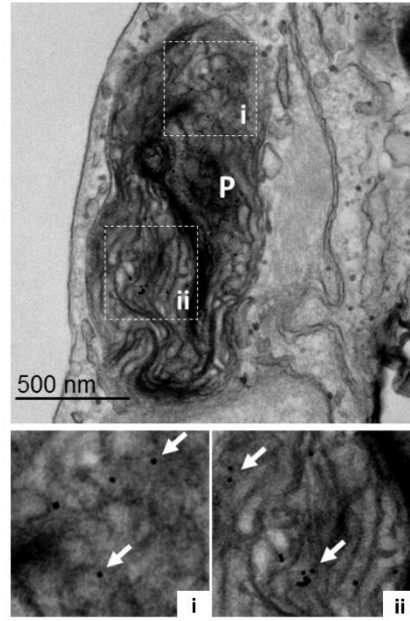

**Figure S4**

**Figure S4. POS phagocytosis tracking by gold loaded POS with TEM.**

Representative images of conventional EM of pRPE pulsed for 4h with POS tagged with 10nm gold colloid. **(A)** At the end of the pulse, POS on the cell surface (pre-internalization) are clearly tagged with gold indicated by the arrows. **(B)** 4h post-pulse, phagosomes within the RPE are also identifiable by the presence of gold.
